# Supplementary material for: Clinical findings of end-stage retinitis pigmentosa with a homozygous PDE6A variant (p.R653X)
Source: PubMed Central journal article supplement — Am J Ophthalmol Case Rep. 2018 Dec 19;13:110–5. doi: 10.1016/j.ajoc.2018.12.019 (PMC6307093; doi:10.1016/j.ajoc.2018.12.019), 2018-12-19
Supplement: mmc2.pdf [file mmc2.pdf]

Supplementary Table S1. Information on the variants that remained after the filtering steps

| Chrom | Position  | Ref | Alt | State   | Gene Name      | Accession number | Exon | Nucleotide change | Amino Acid change | SNP ID       | <i>in silico</i> analysis |                   |                     | Frequency  |            | Reference |                                     |
|-------|-----------|-----|-----|---------|----------------|------------------|------|-------------------|-------------------|--------------|---------------------------|-------------------|---------------------|------------|------------|-----------|-------------------------------------|
|       |           |     |     |         |                |                  |      |                   |                   |              | Polyphen2_HVAR_score      | SIFT_score        | PROVEAN_score       | HGVD       | ExAC       |           | ExAC East Asian                     |
| 1     | 46194329  | T   | C   | Ref/Alt | <i>POMGNT1</i> | NM_001290129     | 8    | c.758A>G          | p.Y253C           | rs200789546  | 0.999 (damaging)          | 0 (damaging)      | -7.15 (deleterious) | 0          | 0          | 0         |                                     |
| 5     | 90642725  | A   | C   | Ref/Alt | <i>ADGRV1</i>  | NM_032119        | 12   | c.2330A>C         | p.E777A           | rs78627723   | 0.939 (damaging)          | 0.172 (tolerated) | -3.04 (deleterious) | 0.00657895 | 0.0001     | 0.0017    |                                     |
| 5     | 149884549 | G   | A   | Alt/Alt | <i>PDE6A</i>   | NM_000440        | 16   | c.1957C>T         | p.R653X           | rs753942596  | not evaluated             | not evaluated     | not evaluated       | 0          | 0.00003302 | 0         | Perez-Carro R et al., 2016, Sci Rep |
| 10    | 71741838  | C   | T   | Ref/Alt | <i>CDH23</i>   | NM_022124        | 36   | c.4762C>T         | p.R1588W          | rs137937502  | 0.996 (damaging)          | not evaluated     | not evaluated       | 0.00513539 | 0.0002     | 0.0019    | Miyagawa M et al. 2013, Plos One    |
| 11    | 8094153   | G   | A   | Alt/Alt | <i>TUB</i>     | NM_177972        | 4    | c.361G>A          | p.G121S           | rs768447598  | 0.063 (benign)            | 0.464 (tolerated) | -0.42 (neutral)     | 0.00520833 | 0.00002506 | 0.0001    |                                     |
| 17    | 8014012   | A   | G   | Ref/Alt | <i>GUCY2D</i>  | NM_000180        | 12   | c.2396A>G         | p.D799G           | not reported | 0.247 (benign)            | 0.02 (damaging)   | -5.64 (deleterious) | 0          | 0          | 0         |                                     |
| X     | 85894235  | C   | T   | Ref/Alt | <i>CHM</i>     | NM_000390        | 12   | c.1463G>A         | p.R488Q           | not reported | 0.478 (possibly damaging) | 0.211 (tolerated) | -1.56 (neutral)     | 0          | 0          | 0         |                                     |

Chro = chromosome, Ref = reference allele, Alt = alternative allele, The position of variants is determined using the Human Genome reference (GRCh37/hg19), HGVD = human genetic variation database (<http://www.hgvd.genome.med.kyoto-u.ac.jp/index.html>), ExAC = Exome Aggregation Consortium database (<http://exac.broadinstitute.org>), Polyphen-2 (<http://genetics.bwh.harvard.edu/pph2/>), SIFT (<http://sift.jcvi.org>), PROVEAN (<http://provean.jcvi.org>)
